# Supplementary material
Source: PubMed Central journal article supplement (PMC5425378)

**Biophysical Journal, Volume 112**

**Supplemental Information**

**Visualizing Calcium Flux in Freely Moving Nematode Embryos**

**Evan L. Ardiel, Abhishek Kumar, Joseph Marbach, Ryan Christensen, Rishi Gupta, William Duncan, Jonathan S. Daniels, Nico Stuurman, Daniel Colón-Ramos, and Hari Shroff**

23 **Figure S1. Micro-manager plugin.** Screenshots of the setup **(a)** and acquisition  
24 tabs **(b)**. Further documentation on the plugin is available at [https://micro-  
26 manager.org/wiki/ASIdiSPIM\\_Plugin](https://micro-<br/>25 manager.org/wiki/ASIdiSPIM_Plugin) and [http://dispim.org/software/micro-  
28 manager](http://dispim.org/software/micro-<br/>27 manager).

28 **Figure S2. Calcium events in muscles of two-fold embryos.** Raster plots  
29 duplicated from **Fig. 1c** with traces of mean  $dF/F$  of the bundle. Open circles denote  
30 calcium waves (peaks separated by at least 5 s with  $dF/F > 1.5$ ), while arrows  
31 denote more localized events. Imaging was performed at 2 Hz (volumetric).

32  
33 **Figure S3. Cell counts.** Number of *unc-31* expressing cells at various stages of  
34 embryogenesis. The 2-fold cell counts are from three different embryos, while the 3-  
35 fold cell counts are derived from the embryo described in text. Circles correspond to  
36 individual volume counts.

37  
38 **Figure S4. Segmenting nuclei.** 5 of 40 slices raw **(a)** or with colored dots denoting  
39 local maxima **(b)** or nuclear centers **(c)**. Scale bar: 10 $\mu$ m.

40  
41 **Figure S5. Fluorescein fluorescence control.** To ensure that intensity changes in  
42 excitation did not cause significant fluctuations in GCaMP, we measured the  
43 apparent intensity of a uniform fluorescein dye solution under conditions identical  
44 to those in the experiments in **Fig. 2.** **a)** Representative maximum projection

45 showing the positions at which fluorescein intensity was measured over time. **b)**  
46 dF/F traces across 298 frames (positions indicated in **a**).

47

48 **Figure S6. Pan-neuronal imaging. a)** dF/F traces for neuronal nuclei tracked from  
49 a mid-3-fold (2 hours after the dataset presented in **Fig. 2**) embryo expressing  
50 nuclear-localized GCaMP5K from an *unc-31* promoter. Cell 1 here matches cell 1 in  
51 **Fig 2. b)** 1/length (as indicated in **Fig. 2b**) and dF/F traces for ventral nerve cord  
52 neurons. Note the correlation between the length metric (black) and the top trace.  
53 Imaging was performed at 1.4 Hz (volumetric).

54

55 **Figure S7. Determining measurement regions in AVA datasets. a)** Maximum  
56 intensity projections of an embryo expressing GCaMP3 from an *nmr-1* promoter.  
57 Scale bar: 10 $\mu$ m. **b)** Intensity profile through the stack at crosses shown on left. Peak  
58 location defines the slice from which intensity is extracted for each cell. **c)** Whole  
59 image dF/F traces for 17 embryos. Arrowheads indicate traces with dF/F events >  
60 0.6 and double arrowheads indicate samples in which cell bodies were tracked.  
61 Imaging was performed at 1.4 Hz (volumetric).

62

63 **Movie S1.** Lateral maximum intensity projection of 4 embryos at the 1.75-fold stage  
64 expressing GCaMP3 in muscle cells. Panels are synchronized to first twitch (at  
65 t=100s). Scale bar: 10 $\mu$ m. Imaging was performed at 2 Hz (volumetric).

66

67 **Movie S2.** Two-fold embryo expressing GCaMP3 in muscle cells. Lateral maximum  
68 intensity projection (top) and cross-sectional view (bottom, corresponding to white  
69 line in top panel). Scale bar: 10 $\mu$ m. Imaging was performed at 2 Hz (volumetric).

70

71 **Movie S3.** Lateral maximum intensity projection of a three-fold embryo expressing  
72 GCaMP3 in muscle cells. Scale bar: 10 $\mu$ m. Imaging was performed at 5 Hz  
73 (volumetric).

74

75 **Movie S4.** Three-fold embryo expressing GCaMP3 in muscle cells. Maximum  
76 intensity projections before (left) and after (middle) computational untwisting.  
77 Yellow line denotes the position of the cross-section shown at upper right. Scale bar:  
78 10 $\mu$ m. Imaging was performed at 2 Hz (volumetric).

79

80 **Movie S5.** Early three-fold embryo expressing nuclear localized GCaMP5K from an  
81 *unc-31* promoter. Lateral maximum intensity projection (left) and corresponding  
82 schematic representations of  $dF/F$  (right; color and size scale corresponds to  $dF/F=$   
83 0, 1, and 2+). Scale bar: 10 $\mu$ m. Imaging was performed at 1.4 Hz (volumetric).

84

85 **Movie S6.** Mid-stage three-fold embryo expressing nuclear localized GCaMP5K from  
86 an *unc-31* promoter. Lateral maximum intensity projection (left) and corresponding  
87 schematic representations of  $dF/F$  (right; color and size scale corresponds to  $dF/F=$   
88 0, 1, and 2+). Scale bar: 10 $\mu$ m. 1.4 Hz (volumetric).

89

90 **Movie S7.** Maximum intensity projection of a late three-fold embryo expressing  
91 GCaMP3 from an *nmr-1* promoter (ImageJ Fire look up table was used for display).

92 Scale bar: 10 $\mu$ m. 1.4 Hz (volumetric).

93

94

95

96

97

98

a

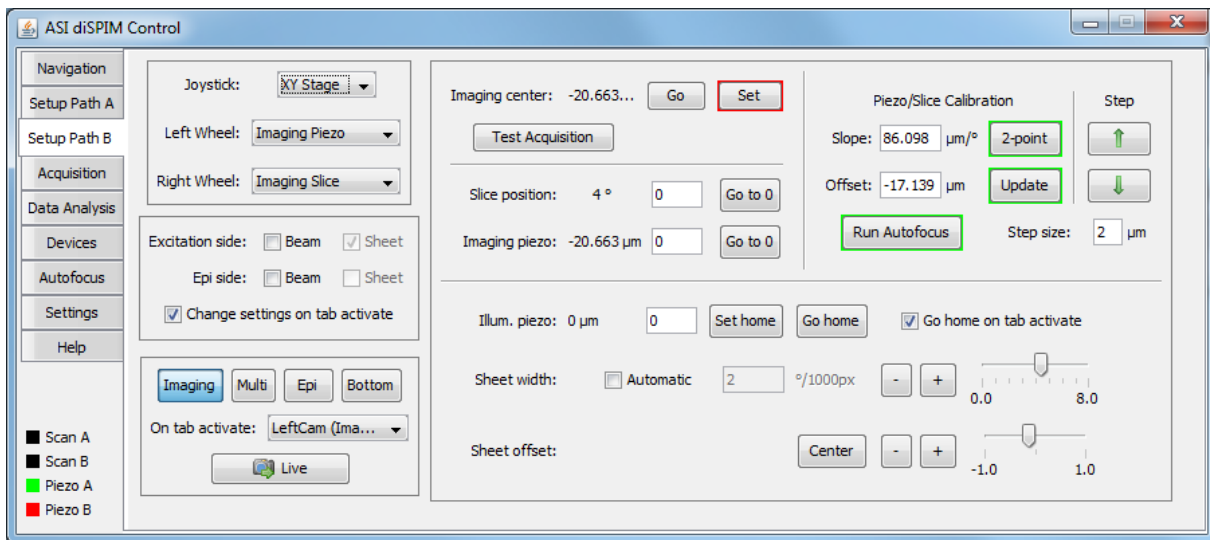

b

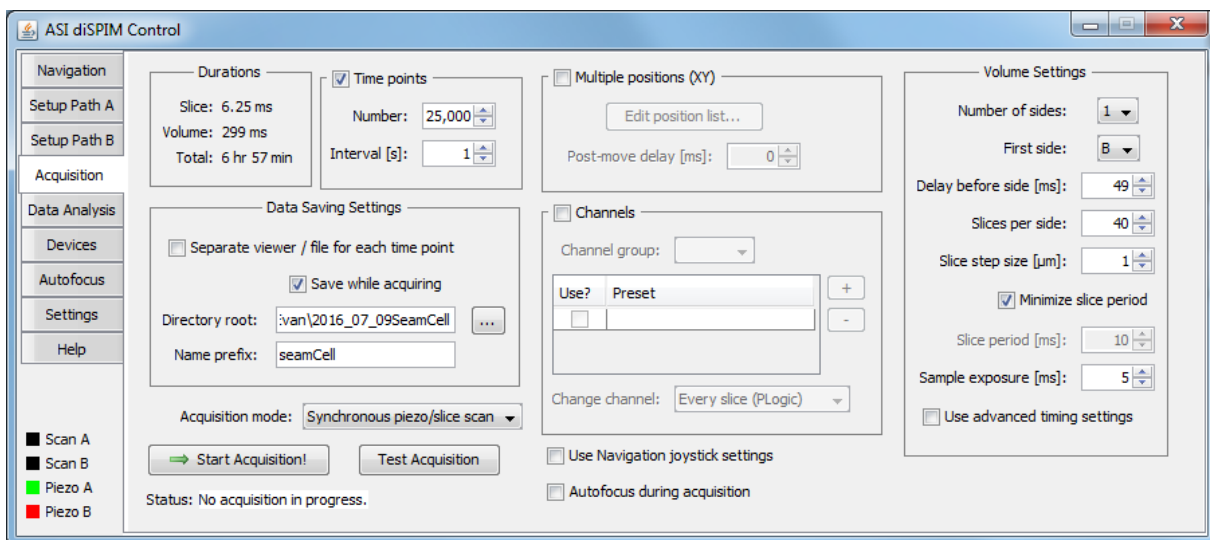

Supp Fig 2

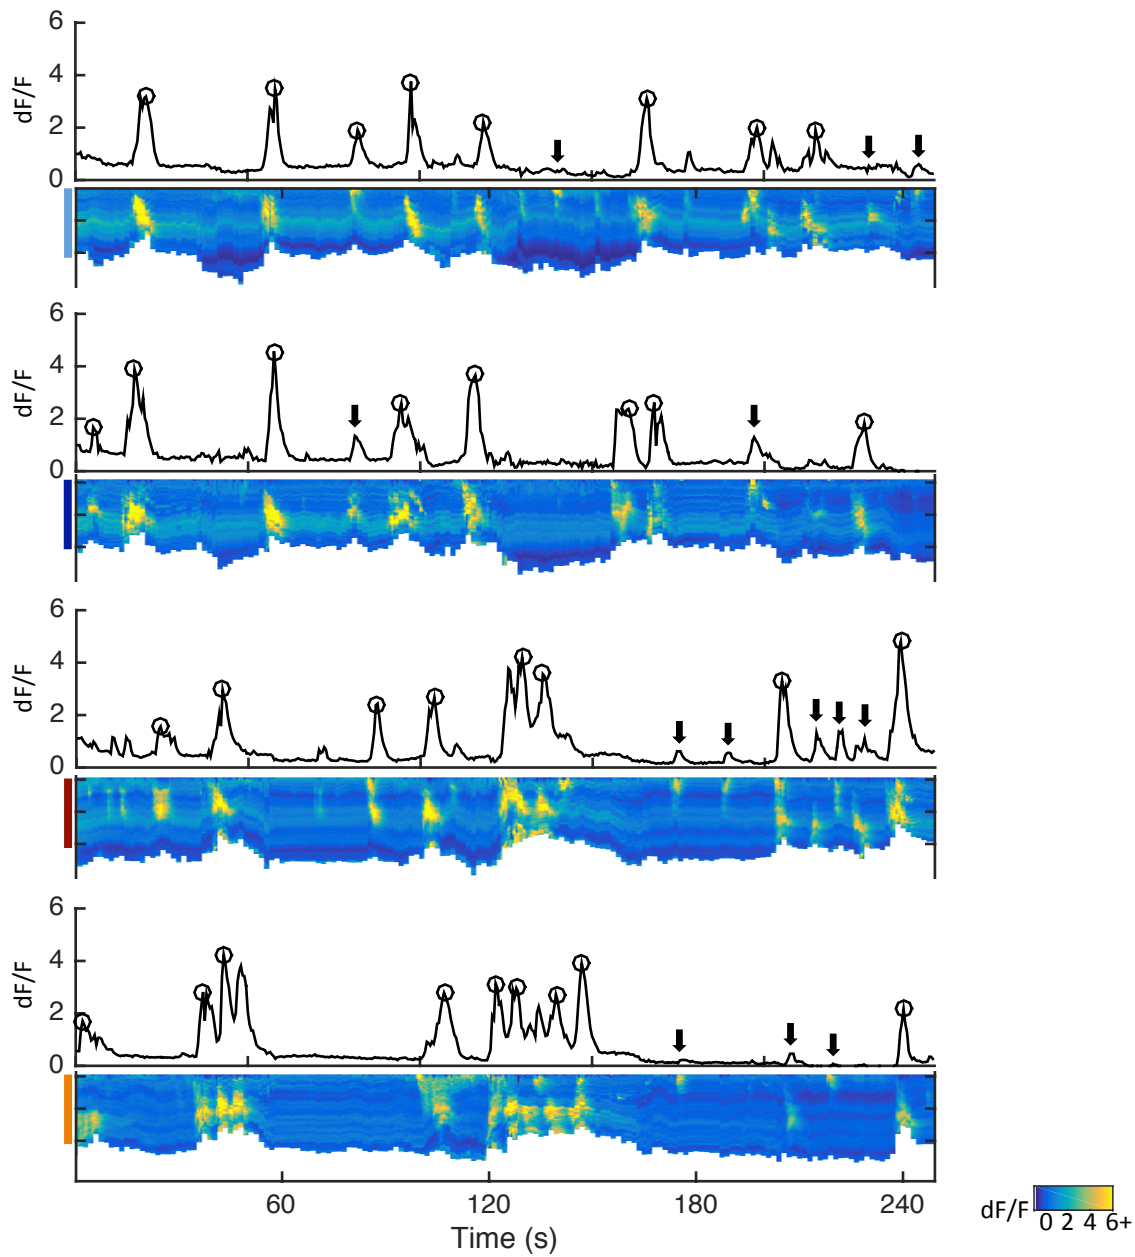

Supp Fig 3

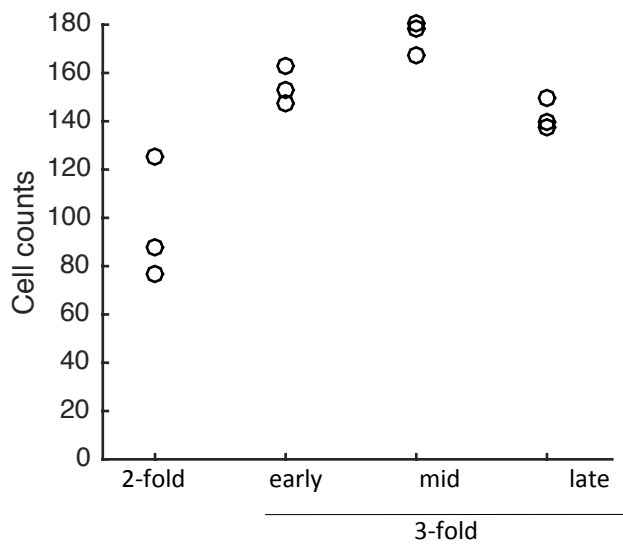



Supp Fig 4

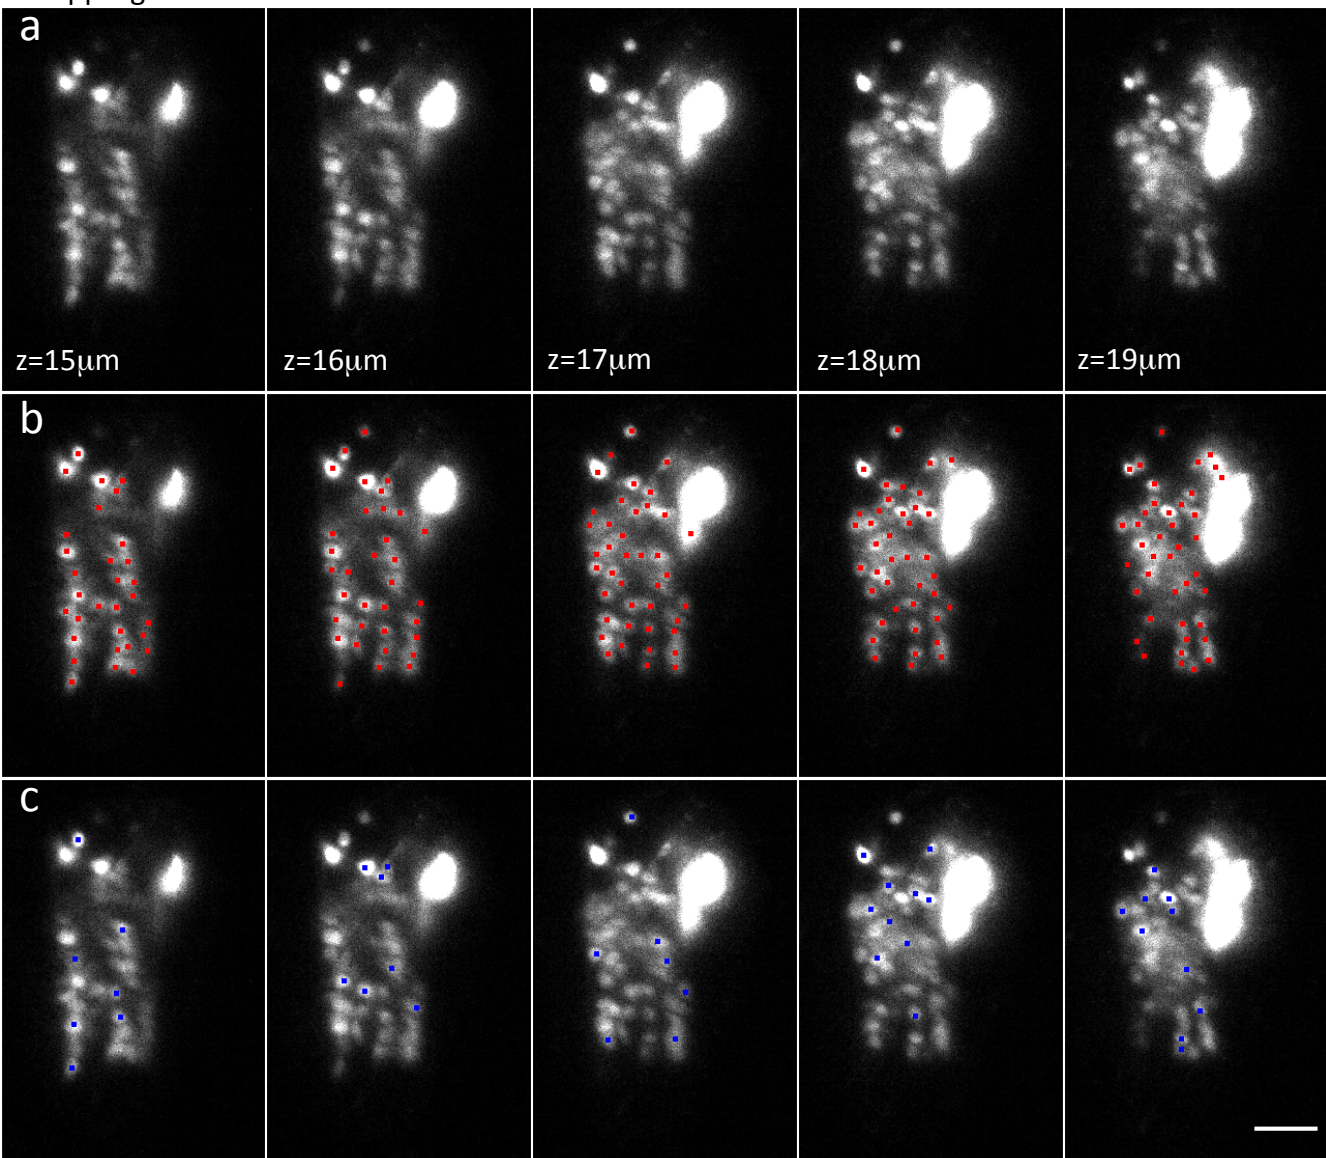

a

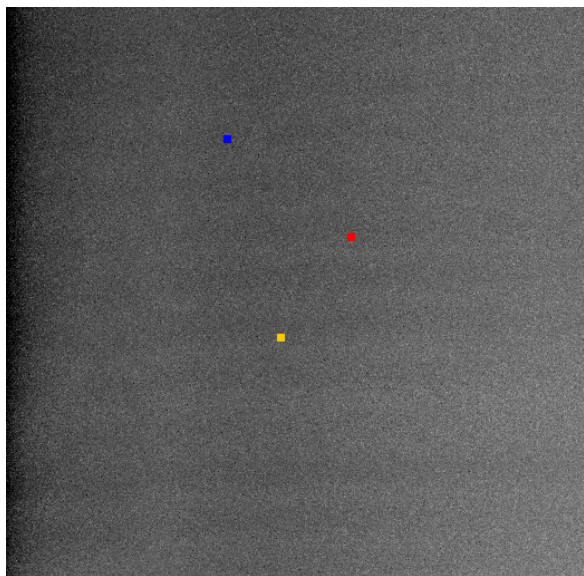

b

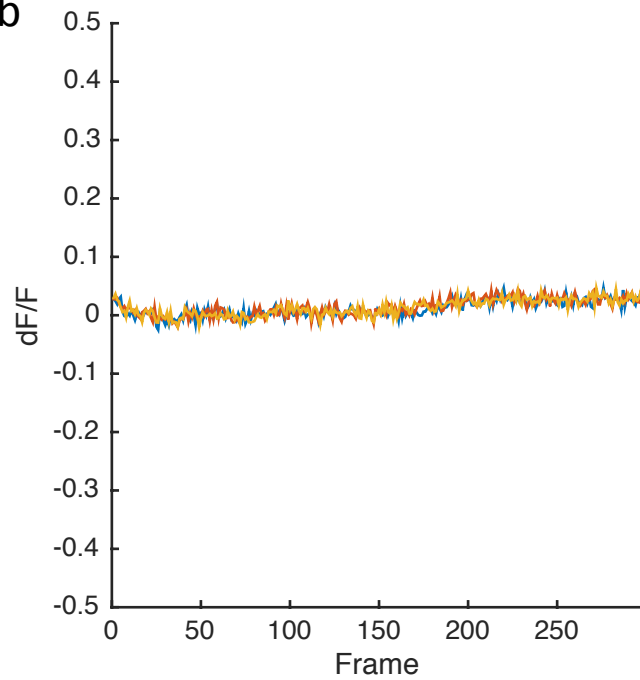

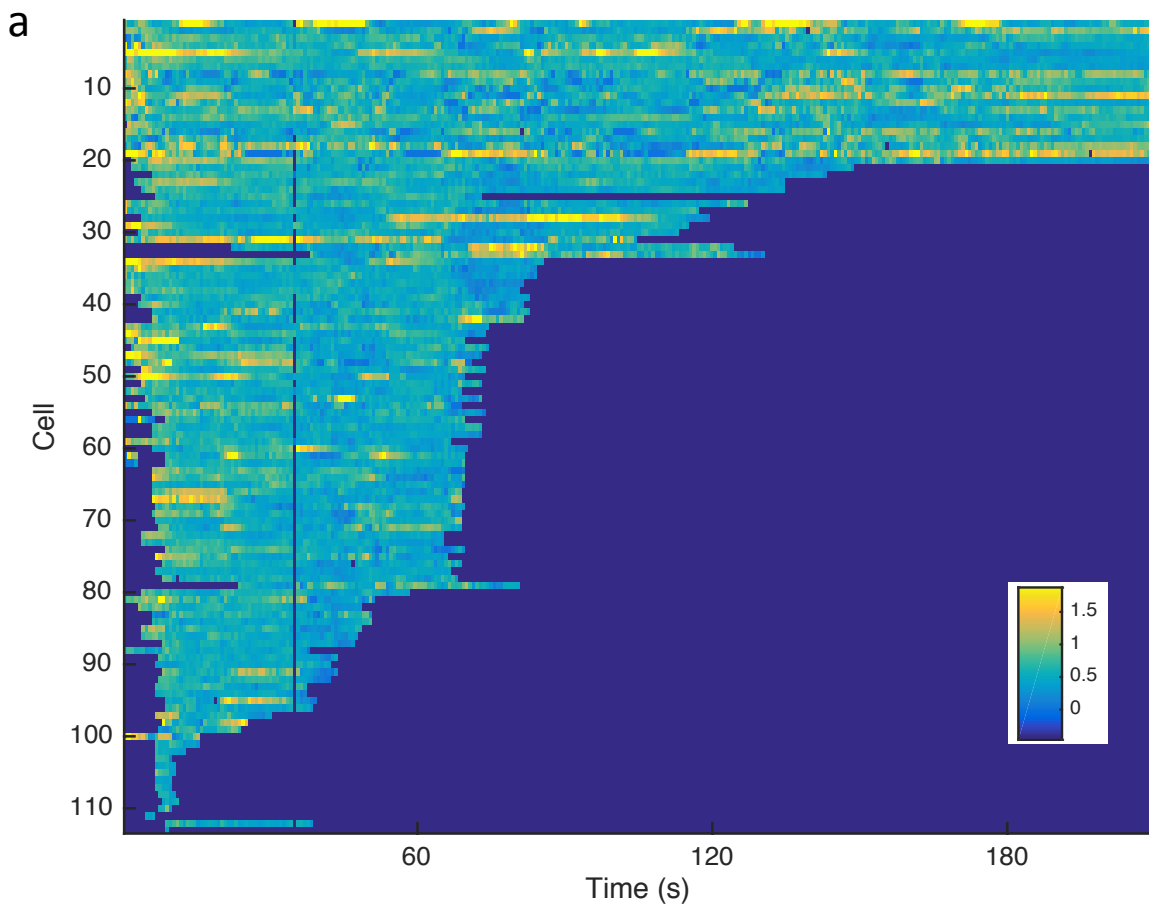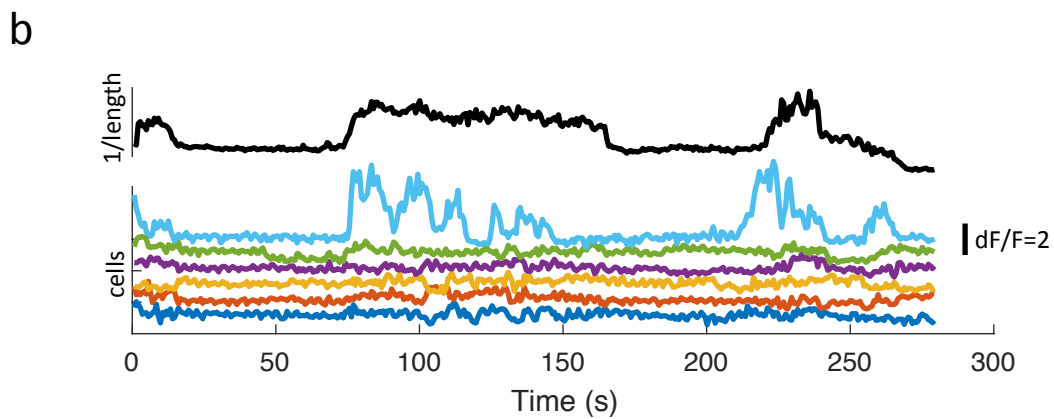

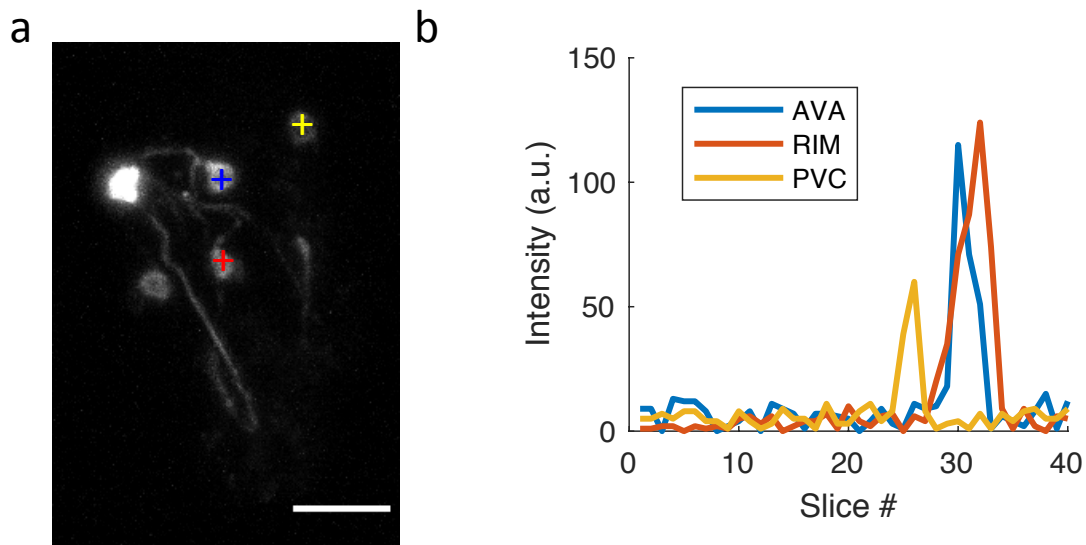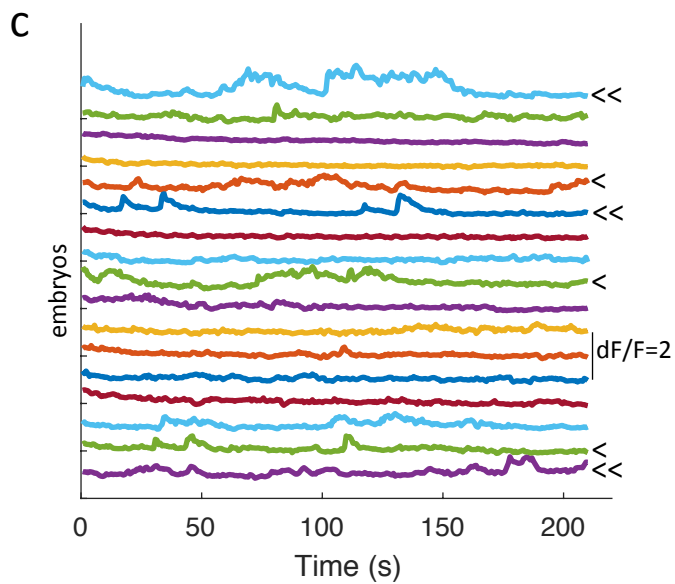

Supplement: mmc1.pdf [file mmc1.pdf]
